# Supplementary material for: Evaluation of Thermodynamic and Kinetic Contributions to Over-Extraction of Extractables by Nonpolar Organic Solvents in Comparison to Lipids in Exhaustive and Exaggerated Extractions of Medical Devices Based on Abraham Solvation Model and Solvent–Material Interactions Using Low-Density Polyethylene as a Representative Material
Source: MDPI journal article supplement (doi:10.3390/liquids4010006), 2024-01-23
Supplement: s1 [file s1]

# MANUSCRIPT SUPPLEMENTAL INFORMATION (SI)

## SI-A. Experimental LDPE-Lipid Partition coefficients ( $P_{ldpe/lipid}$ )

Table SI-A tabulates the measured LDPE-lipid partition coefficients and their physicochemical properties [42-47]. The data by Ref [47] are used in the LDPE-lipid model construction (Section 2.2).

| Table S1. Tabulation of Analytes with Measured Partition coefficients ( $P_{ldpe/lipid}$ ) and Their Physicochemical Properties |    |                          |            |       |                                                            |        |        |         |        |        |                  |                     |
|---------------------------------------------------------------------------------------------------------------------------------|----|--------------------------|------------|-------|------------------------------------------------------------|--------|--------|---------|--------|--------|------------------|---------------------|
| Ref #                                                                                                                           | #  | Analytes                 | CAS #      | MW    | SMILES                                                     | E      | S      | A       | B      | V      | $P_{ldpe/lipid}$ | $\log_{10} P_{o/w}$ |
| [47] <sup>a</sup>                                                                                                               | 1  | Hexachloro-1,3-butadiene | 87-68-3    | 260.8 | <chem>C(=C(Cl)Cl)(C(=C(Cl)Cl)Cl)Cl</chem>                  | 0.9964 | 0.4721 | -0.001  | 0.1348 | 1.3206 | 0.26             | 4.72                |
|                                                                                                                                 | 2  | Pentachlorobenzene       | 608-93-5   | 250.3 | <chem>C1=C(C(=C(C(=C1Cl)Cl)Cl)Cl)Cl</chem>                 | 1.3262 | 0.9105 | 0.0368  | 0.0069 | 1.3284 | 0.252            | 4.92                |
|                                                                                                                                 | 3  | Hexachlorobenzene        | 118-74-1   | 284.8 | <chem>C1(=C(C(=C(C(=C1Cl)Cl)Cl)Cl)Cl)Cl</chem>             | 1.4616 | 0.8233 | 0.0136  | 0.0502 | 1.4508 | 0.309            | 5.40                |
|                                                                                                                                 | 4  | PCB 18                   | 37680-65-2 | 257.5 | <chem>C1=CC=C(C(=C1)C2=C(C(=CC(=C2)Cl)Cl)Cl</chem>         | 1.7467 | 1.352  | 0.0003  | 0.1689 | 1.6914 | 0.088            | 5.51                |
|                                                                                                                                 | 5  | PCB 28                   | 7012-37-5  | 257.5 | <chem>C1=CC(=CC=C1C2=C(C(=C(C(=C2)Cl)Cl)Cl</chem>          | 1.7603 | 1.332  | 0.0006  | 0.1557 | 1.6914 | 0.114            | 5.59                |
|                                                                                                                                 | 6  | PCB 31                   | 16606-02-3 | 257.5 | <chem>C1=CC(=CC=C1C2=C(C(=CC(=C2)Cl)Cl)Cl</chem>           | 1.7758 | 1.3344 | 0.0016  | 0.1526 | 1.6914 | 0.094            | 5.60                |
|                                                                                                                                 | 7  | PCB 44                   | 41464-39-5 | 292   | <chem>C1=CC(=C(C(=C1Cl)Cl)C2=C(C(=CC(=C2)Cl)Cl</chem>      | 1.8891 | 1.4854 | 0.0013  | 0.148  | 1.8138 | 0.0756           | 5.99                |
|                                                                                                                                 | 8  | PCB 49                   | 41464-40-8 | 292   | <chem>C1=CC(=C(C(=C1Cl)Cl)C2=C(C(=CC(=C2)Cl)Cl</chem>      | 1.8888 | 1.4834 | 0.0013  | 0.148  | 1.8138 | 0.0852           | 5.99                |
|                                                                                                                                 | 9  | PCB 52                   | 35693-99-3 | 292   | <chem>C1=CC(=C(C(=C1Cl)C2=C(C(=CC(=C2)Cl)Cl)Cl</chem>      | 1.8975 | 1.4797 | 0.001   | 0.1494 | 1.8138 | 0.079            | 6.00                |
|                                                                                                                                 | 10 | PCB 101                  | 37680-73-2 | 326.4 | <chem>C1=CC(=C(C(=C1Cl)C2=CC(=C(C(=C2Cl)Cl)Cl)Cl</chem>    | 2.0379 | 1.6143 | 0.0004  | 0.1285 | 1.9362 | 0.0855           | 6.47                |
|                                                                                                                                 | 11 | PCB 118                  | 31508-00-6 | 326.4 | <chem>C1=CC(=C(C(=C1C2=CC(=C(C(=C2Cl)Cl)Cl)Cl)Cl</chem>    | 2.0606 | 1.5793 | 0.0004  | 0.1122 | 1.9362 | 0.0952           | 6.58                |
|                                                                                                                                 | 12 | PCB 138                  | 35065-28-2 | 360.9 | <chem>C1=CC(=C(C(=C1C2=CC(=C(C(=C2Cl)Cl)Cl)Cl)Cl)Cl</chem> | 2.1798 | 1.7379 | 0.0014  | 0.1076 | 2.0586 | 0.0864           | 6.96                |
|                                                                                                                                 | 13 | PCB 153                  | 35065-27-1 | 360.9 | <chem>C1=C(C(=CC(=C1Cl)Cl)C2=CC(=C(C(=C2Cl)Cl)Cl</chem>    | 2.1657 | 1.7331 | -0.0009 | 0.1081 | 2.0586 | 0.097            | 6.96                |
|                                                                                                                                 | 14 | PCB 170                  | 35065-30-6 | 395.3 | <chem>C1=CC(=C(C(=C1C2=CC(=C(C(=C2Cl)Cl)Cl)Cl)Cl)Cl</chem> | 2.3255 | 1.8739 | 0.0011  | 0.0894 | 2.181  | 0.086            | 7.43                |
|                                                                                                                                 | 15 | PCB 180                  | 35065-29-3 | 395.3 | <chem>C1=C(C(=CC(=C1Cl)Cl)C2=CC(=C(C(=C2Cl)Cl)Cl)Cl</chem> | 2.3102 | 1.8708 | 0.0025  | 0.0894 | 2.181  | 0.0995           | 7.42                |
|                                                                                                                                 | 16 | PCB 187                  | 52663-68-0 | 395.3 | <chem>C1=C(C(=CC(=C1Cl)Cl)C2=C(C(=CC(=C2Cl)Cl)Cl)Cl</chem> | 2.2923 | 1.8701 | 0.0015  | 0.0925 | 2.181  | 0.0978           | 7.40                |
|                                                                                                                                 | 17 | PCB 77                   | 32598-13-3 | 292   | <chem>C1=CC(=C(C(=C1C2=CC(=C(C(=C2)Cl)Cl)Cl)Cl</chem>      | 1.9438 | 1.4515 | -0.0007 | 0.1132 | 1.8138 | 0.0903           | 6.18                |
|                                                                                                                                 | 18 | PCB 81                   | 70362-50-4 | 292   | <chem>C1=CC(=CC=C1C2=CC(=C(C(=C2)Cl)Cl)Cl)Cl</chem>        | 1.9365 | 1.4411 | 0.001   | 0.1124 | 1.8138 | 0.106            | 6.19                |
|                                                                                                                                 | 19 | PCB 105                  | 32598-14-4 | 326.4 | <chem>C1=CC(=C(C(=C1C2=C(C(=C(C(=C2)Cl)Cl)Cl)Cl)Cl</chem>  | 2.0585 | 1.5862 | 0.0005  | 0.1136 | 1.9362 | 0.0877           | 6.56                |
|                                                                                                                                 | 20 | PCB 114                  | 74472-37-0 | 326.4 | <chem>C1=CC(=CC=C1C2=CC(=C(C(=C2Cl)Cl)Cl)Cl)Cl</chem>      | 2.0508 | 1.5726 | 0.0022  | 0.1129 | 1.9362 | 0.1096           | 6.58                |

|    |                        |            |         |                                                                                      |        |        |         |        |        |        |      |
|----|------------------------|------------|---------|--------------------------------------------------------------------------------------|--------|--------|---------|--------|--------|--------|------|
| 21 | PCB 123                | 65510-44-3 | 326.4   | <chem>C1=CC(=C(C=C1Cl)Cl)C2=CC(=C(C=C2Cl)Cl)Cl</chem>                                | 2.0466 | 1.594  | 0.0016  | 0.1164 | 1.9362 | 0.1003 | 6.54 |
| 22 | PCB 126                | 57465-28-8 | 326.4   | <chem>C1=CC(=C(C=C1C2=CC(=C(C=C2Cl)Cl)Cl)Cl)Cl</chem>                                | 2.0908 | 1.5723 | 0       | 0.0975 | 1.9362 | 0.0878 | 6.65 |
| 23 | PCB 156                | 38380-08-4 | 360.9   | <chem>C1=CC(=C(C=C1C2=CC(=C(C=C2Cl)Cl)Cl)Cl)Cl</chem>                                | 2.199  | 1.7251 | 0.0018  | 0.0955 | 2.0586 | 0.0952 | 7.03 |
| 24 | PCB 157                | 69782-90-7 | 360.9   | <chem>C1=CC(=C(C=C1C2=CC(=C(C=C2Cl)Cl)Cl)Cl)Cl</chem>                                | 2.1945 | 1.7315 | 0.0008  | 0.0957 | 2.0586 | 0.0954 | 7.02 |
| 25 | PCB 167                | 52663-72-6 | 360.9   | <chem>C1=C(C=C(C=C1Cl)Cl)Cl)C2=CC(=C(C=C2Cl)Cl)Cl</chem>                             | 2.2059 | 1.7223 | 0.0018  | 0.0941 | 2.0586 | 0.1034 | 7.04 |
| 26 | PCB 169                | 32774-16-6 | 360.9   | <chem>C1=C(C=C(C=C1Cl)Cl)Cl)C2=CC(=C(C=C2Cl)Cl)Cl</chem>                             | 2.2158 | 1.7063 | -0.0006 | 0.077  | 2.0586 | 0.0911 | 7.12 |
| 27 | PCB 189                | 39635-31-9 | 395.3   | <chem>C1=C(C=C(C=C1Cl)Cl)Cl)C2=CC(=C(C=C2Cl)Cl)Cl</chem>                             | 2.2158 | 1.7063 | -0.0006 | 0.077  | 2.0586 | 0.1023 | 7.12 |
| 28 | Naphthalene            | 91-20-3    | 128.169 | <chem>C1=CC=C2C=CC=CC2=C1</chem>                                                     | 1.3366 | 0.8919 | 0.0001  | 0.2135 | 1.0854 | 0.191  | 3.30 |
| 29 | Acenaphthylene         | 208-96-8   | 152.19  | <chem>C1=CC2=C3C(=C1)C=CC3=CC=C2</chem>                                              | 1.7787 | 1.1599 | 0.0025  | 0.2276 | 1.2156 | 0.161  | 3.71 |
| 30 | Acenaphthene           | 83-92-9    | 154.12  | <chem>C1CC2=CC=CC3=C2C1=CC=C3</chem>                                                 | 1.5673 | 1.0467 | 0.0009  | 0.2235 | 1.2586 | 0.1853 | 3.89 |
| 31 | Fluorene               | 86-73-7    | 166.22  | <chem>C1C2=CC=CC=C2C3=CC=CC=C31</chem>                                               | 1.6647 | 1.1123 | 0.0018  | 0.2299 | 1.3565 | 0.165  | 4.23 |
| 32 | Phenanthrene           | 85-01-8    | 178.23  | <chem>C1=CC=C2C(=C1)C=CC3=CC=CC=C32</chem>                                           | 2.1518 | 1.2906 | 0.0024  | 0.2907 | 1.4544 | 0.152  | 4.48 |
| 33 | Anthracene             | 120-12-7   | 178.23  | <chem>C1=CC=C2C=C3C=CC=CC3=CC2=C1</chem>                                             | 2.2331 | 1.3285 | 0.0019  | 0.2868 | 1.4544 | 0.188  | 4.50 |
| 34 | Fluoranthene           | 206-44-0   | 202.25  | <chem>C1=CC=C2C(=C1)C3=CC=CC4=C3C2=CC=C4</chem>                                      | 2.4081 | 1.5199 | 0.0005  | 0.2388 | 1.5846 | 0.183  | 5.06 |
| 35 | Pyrene                 | 129-00-0   | 202.25  | <chem>C1=CC2=C3C(=C1)C=CC4=CC=CC(=C43)C=C2</chem>                                    | 2.7868 | 1.6865 | 0.003   | 0.2873 | 1.5846 | 0.203  | 4.93 |
| 36 | Benz[a]anthracene      | 56-55-3    | 228.3   | <chem>C1=CC=C2C(=C1)C=CC3=CC4=CC=CC=C4C32</chem>                                     | 3.0436 | 1.7468 | 0.0038  | 0.3368 | 1.8234 | 0.1777 | 5.75 |
| 37 | Chrysene               | 218-01-9   | 228.3   | <chem>C1=CC=C2C(=C1)C=CC3=C2C=CC4=CC=CC=C43</chem>                                   | 2.9849 | 1.7055 | 0.0031  | 0.3459 | 1.8234 | 0.217  | 5.73 |
| 38 | Benzo[b]fluoranthene   | 205-99-2   | 252.3   | <chem>C1=CC=C2C3=C4C(=CC=C3)C5=CC=CC=C5C4=CC2=C1</chem>                              | 3.2109 | 1.8598 | 0.0045  | 0.3737 | 1.9536 | 0.233  | 6.09 |
| 39 | Benzo[k]fluoranthene   | 207-08-9   | 252.3   | <chem>C1=CC=C2C=C3C4=CC=CC5=C4C(=CC=C5)C3=CC2=C1</chem>                              | 3.1981 | 1.9031 | 0.0024  | 0.3613 | 1.9536 | 0.35   | 6.08 |
| 40 | Benzo[a]pyrene         | 50-32-8    | 252.3   | <chem>C1=CC=C2C3=C4C(=CC2=C1)C=CC5=C4C(=CC=C5)C=C3</chem>                            | 3.6746 | 1.9325 | 0.003   | 0.3826 | 1.9536 | 0.361  | 6.24 |
| 41 | Benzo[ghi]perylene     | 191-24-2   | 276.3   | <chem>C1=CC2=C3C(=C1)C4=CC=CC5=C4C6=C(C=C5)C=CC(=C36)C=C2</chem>                     | 4.0694 | 1.9435 | 0.0035  | 0.4497 | 2.0838 | 0.37   | 6.72 |
| 42 | Dibenz[a,h]anthracene  | 53-70-3    | 278.3   | <chem>C1=CC=C2C(=C1)C=CC3=CC4=C(C=CC5=CC=CC=C54)C=C32</chem>                         | 3.9752 | 2.1385 | 0.0024  | 0.4396 | 2.1924 | 0.299  | 6.91 |
| 43 | Indeno[1,2,3-cd]pyrene | 193-39-5   | 276.3   | <chem>C1=CC=C2C(=C1)C3=C4C2=CC5=CC=CC6=C5C4=C(C=C6)C=C3</chem>                       | 3.6831 | 1.9726 | 0.0013  | 0.4404 | 2.0838 | 0.517  | 6.50 |
| 44 | cis-Chlordane          | 5103-71-9  | 409.8   | <chem>C1[C@H]2[C@@H]([C@H]([C@H]1Cl)Cl)[C@]3(C(=C([C@@]2(C3(Cl)Cl)Cl)Cl)Cl)Cl</chem> | 2.1033 | 1.3174 | -0.0055 | 0.5104 | 2.128  | 0.059  | 6.23 |
| 45 | trans-Chlordane        | 5103-74-2  | 409.8   | <chem>C1[C@H]2[C@@H]([C@H]([C@H]1Cl)Cl)[C@]3(C(=C([C@@]2(C3(Cl)Cl)Cl)Cl)Cl)Cl</chem> | 2.1033 | 1.3174 | -0.0055 | 0.5104 | 2.128  | 0.058  | 6.23 |
| 46 | alfa-HCH               | 58-89-9    | 290.8   | <chem>C1(C(C(C(C1Cl)Cl)Cl)Cl)Cl</chem>                                               | 1.4642 | 0.8751 | -0.0012 | 0.6766 | 1.5798 | 0.056  | 3.67 |
| 47 | beta-HCH               | 58-89-9    | 290.8   | <chem>C1(C(C(C(C1Cl)Cl)Cl)Cl)Cl</chem>                                               | 1.4642 | 0.8751 | -0.0012 | 0.6766 | 1.5798 | 0.0281 | 3.67 |

|    |                    |            |        |                                                                                             |        |        |         |        |        |        |      |
|----|--------------------|------------|--------|---------------------------------------------------------------------------------------------|--------|--------|---------|--------|--------|--------|------|
| 48 | gamma-HCH          | 58-89-9    | 290.8  | <chem>C1(C(C(C(C(C1Cl)Cl)Cl)Cl)Cl)Cl</chem>                                                 | 1.4642 | 0.8751 | -0.0012 | 0.6766 | 1.5798 | 0.052  | 3.67 |
| 49 | delta-HCH          | 58-89-9    | 290.8  | <chem>C1(C(C(C(C(C1Cl)Cl)Cl)Cl)Cl)Cl</chem>                                                 | 1.4642 | 0.8751 | -0.0012 | 0.6766 | 1.5798 | 0.0318 | 3.67 |
| 50 | 2,4'-DDD           | 53-19-0    | 320    | <chem>C1=CC=C(C(=C1)C(C2=CC=C(C=C2)Cl)C(Cl)Cl)Cl</chem>                                     | 1.7859 | 1.7242 | 0.0756  | 0.2549 | 2.0956 | 0.0484 | 6.39 |
| 51 | 2,4'-DDE           | 3424-82-6  | 318    | <chem>C1=CC=C(C(=C1)C(=C(Cl)Cl)C2=CC=C(C=C2)Cl)Cl</chem>                                    | 1.8681 | 1.4832 | 0.0171  | 0.1805 | 2.0526 | 0.0794 | 6.78 |
| 52 | 2,4'-DDT           | 789-02-6   | 354.5  | <chem>C1=CC=C(C(=C1)C(C2=CC=C(C=C2)Cl)C(Cl)(Cl)Cl)Cl</chem>                                 | 1.8356 | 1.7212 | 0.0016  | 0.2342 | 2.218  | 0.0656 | 6.95 |
| 53 | 4,4'-DDD           | 72-54-8    | 320    | <chem>C1=CC(=CC=C1C(C2=CC=C(C=C2)Cl)C(Cl)Cl)Cl</chem>                                       | 1.7684 | 1.7109 | 0.0582  | 0.2412 | 2.0956 | 0.0331 | 6.44 |
| 54 | 4,4'-DDE           | 72-55-9    | 318    | <chem>C1=CC(=CC=C1C(=C(Cl)Cl)C2=CC=C(C=C2)Cl)Cl</chem>                                      | 1.8368 | 1.4274 | 0.0381  | 0.1498 | 2.0526 | 0.085  | 6.93 |
| 55 | 4,4'-DDT           | 50-29-3    | 354.5  | <chem>C1=CC(=CC=C1C(C2=CC=C(C=C2)Cl)C(Cl)(Cl)Cl)Cl</chem>                                   | 1.8195 | 1.7235 | 0.0036  | 0.1956 | 2.218  | 0.039  | 7.08 |
| 56 | Aldrin             | 309-00-2   | 354.9  | <chem>C1[C@@H]2C=C[C@H]1[C@H]3[C@@H]2[C@]4(C=C([C@@]3(C4(Cl)Cl)Cl)Cl)Cl</chem>              | 2.0831 | 1.0454 | 0.0071  | 0.4613 | 2.0134 | 0.121  | 6.24 |
| 57 | Dieldrin           | 60-57-1    | 380.9  | <chem>C1[C@@H]2[C@H]3[C@@H]([C@H]1[C@H]4[C@@H]2O4)[C@]5(C=C([C@@]3(C5(Cl)Cl)Cl)Cl)Cl</chem> | 2.0833 | 1.5199 | -0.001  | 0.6885 | 2.0065 | 0.078  | 4.93 |
| 58 | Endrin             | 72-20-8    | 380.9  | <chem>C1C2C3C(C1C4C2O4)C5(C(=C(C3(C5(Cl)Cl)Cl)Cl)Cl)Cl</chem>                               | 2.0833 | 1.5199 | -0.001  | 0.6885 | 2.0065 | 0.0745 | 4.93 |
| 59 | Isodrin            | 465-73-6   | 364.9  | <chem>C1[C@@H]2C=C[C@H]1[C@@H]3[C@H]2[C@@]4(C=C([C@@]3(C4(Cl)Cl)Cl)Cl)Cl</chem>             | 2.0831 | 1.0454 | 0.0071  | 0.4613 | 2.0134 | 0.11   | 6.24 |
| 60 | Telodrin           | 297-78-9   | 411.7  | <chem>C12C(C(OC1Cl)Cl)C3(C(=C(C2(C3(Cl)Cl)Cl)Cl)Cl)Cl</chem>                                | 2.171  | 1.0184 | -0.0164 | 0.6512 | 2.0458 | 0.0752 | 5.78 |
| 61 | Heptachlor         | 75-44-8    | 373.3  | <chem>C1=CC(C2C1C3(C(=C(C2(C3(Cl)Cl)Cl)Cl)Cl)Cl)Cl</chem>                                   | 2.0589 | 1.0303 | -0.0002 | 0.5136 | 1.9626 | 0.0831 | 5.87 |
| 62 | Heptachlor epoxide | 1024-57-3  | 389.3  | <chem>C12C(C(C3C1O3)Cl)C4(C(=C(C2(C4(Cl)Cl)Cl)Cl)Cl)Cl</chem>                               | 2.1067 | 1.2216 | -0.001  | 0.5955 | 1.9557 | 0.0556 | 5.38 |
| 63 | beta-Endosulfan    | 959-98-8   | 406.9  | <chem>C1[C@@H]2[C@H]1(COS(=O)O1)[C@@]3(C=C([C@@]2(C3(Cl)Cl)Cl)Cl)Cl</chem>                  | 2.2042 | 1.0337 | -0.0067 | 1.0144 | 2.0819 | 0.0449 | 4.67 |
| 64 | Endosulfan sulfate | 1031-07-8  | 422.9  | <chem>C1C2C(COS(=O)(=O)O1)C3(C(=C(C2(C3(Cl)Cl)Cl)Cl)Cl)Cl</chem>                            | 2.1653 | 1.3662 | 0.0306  | 1.1089 | 2.1406 | 0.0345 | 4.19 |
| 65 | Biphenyl-d10 (PRC) | 1486-01-7  | 164.27 | <chem>[2H]C1=C(C(=C(C(=C1[2H])[2H])C2=C(C(=C(C(=C2[2H])[2H])[2H])[2H])[2H])[2H])[2H]</chem> | 1.4149 | 1.4044 | 0.0334  | 0.492  | 1.3242 | 0.1293 | 2.75 |
| 66 | PCB 1 (PRC)        | 2051-60-7  | 188.65 | <chem>C1=CC=C(C=C1)C2=CC=CC=C2Cl</chem>                                                     | 1.4964 | 1.0731 | 0.0018  | 0.2006 | 1.4466 | 0.124  | 4.62 |
| 67 | PCB2 (PRC)         | 2051-61-8  | 188.65 | <chem>C1=CC=C(C=C1)C2=CC(=CC=C2)Cl</chem>                                                   | 1.515  | 1.061  | 0.0027  | 0.1815 | 1.4466 | 0.1166 | 4.71 |
| 68 | PCB 3 (PRC)        | 2051-62-9  | 188.65 | <chem>C1=CC=C(C=C1)C2=CC=C(C=C2)Cl</chem>                                                   | 1.4994 | 1.0625 | 0.0016  | 0.1815 | 1.4466 | 0.1289 | 4.70 |
| 69 | PCB 10 (PRC)       | 33146-45-1 | 223.09 | <chem>C1=CC=C(C=C1)C2=C(C=CC=C2Cl)Cl</chem>                                                 | 1.6255 | 1.2085 | 0.0001  | 0.1963 | 1.569  | 0.115  | 5.03 |
| 70 | PCB 14 (PRC)       | 34883-41-5 | 223.09 | <chem>C1=CC=C(C=C1)C2=CC(=CC(=C2)Cl)Cl</chem>                                               | 1.6341 | 1.1783 | 0.0008  | 0.1648 | 1.569  | 0.1228 | 5.18 |
| 71 | PCB 21 (PRC)       | 55702-46-0 | 257.5  | <chem>C1=CC=C(C=C1)C2=C(C(=C(C=C2)Cl)Cl)Cl</chem>                                           | 1.7801 | 1.3462 | 0.0006  | 0.1572 | 1.6914 | 0.1135 | 5.58 |
| 72 | PCB 30 (PRC)       | 35693-92-6 | 257.5  | <chem>C1=CC=C(C=C1)C2=C(C(=C(C=C2Cl)Cl)Cl)Cl</chem>                                         | 1.7485 | 1.3373 | 0.0017  | 0.166  | 1.6914 | 0.1265 | 5.54 |
| 73 | PCB 50 (PRC)       | 62796-65-0 | 292    | <chem>C1=CC=C(C(=C1)C2=C(C(=C(C=C2Cl)Cl)Cl)Cl)Cl</chem>                                     | 1.8648 | 1.4865 | 0.001   | 0.1559 | 1.8138 | 0.116  | 5.95 |
| 74 | PCB 55 (PRC)       | 74338-24-2 | 292    | <chem>C1=CC(=CC(=C1)Cl)C2=C(C(=C(C=C2)Cl)Cl)Cl</chem>                                       | 1.9124 | 1.4621 | 0.001   | 0.1346 | 1.8138 | 0.0966 | 6.07 |
| 75 | PCB 78 (PRC)       | 70362-49-1 | 292    | <chem>C1=CC(=CC(=C1)Cl)C2=CC(=C(C(=C2)Cl)Cl)Cl</chem>                                       | 1.9408 | 1.4436 | 0.0012  | 0.1142 | 1.8138 | 0.0868 | 6.18 |

|                       |     |                                                                               |            |        |                                                                                     |        |        |         |        |        |       |       |
|-----------------------|-----|-------------------------------------------------------------------------------|------------|--------|-------------------------------------------------------------------------------------|--------|--------|---------|--------|--------|-------|-------|
|                       | 76  | PCB104 (PRC)                                                                  | 56558-16-8 | 326.4  | <chem>C1=CC(=C(C(=C1)Cl)C2=C(C(=C(C(=C2)Cl)Cl)Cl)Cl</chem>                          | 1.9876 | 1.6143 | 0.0009  | 0.1346 | 1.9362 | 0.107 | 6.42  |
|                       | 77  | PCB 145 (PRC)                                                                 | 74472-40-5 | 360.9  | <chem>C1=CC(=C(C(=C1)Cl)C2=C(C(=C(C(=C2)Cl)Cl)Cl)Cl</chem>                          | 2.1408 | 1.7426 | 0.0022  | 0.1131 | 2.0586 | 0.103 | 6.91  |
|                       | 78  | PCB 204 (PRC)                                                                 | 74472-52-9 | 429.8  | <chem>C1=C(C(=C(C(=C1)Cl)C2=C(C(=C(C(=C2)Cl)Cl)Cl)Cl)Cl)Cl</chem>                   | 2.4527 | 2.0034 | 0.004   | 0.0637 | 2.3034 | 0.156 | 7.92  |
| [43] <sup>b</sup>     | A1  | Styrene                                                                       | 100-42-5   | 104.2  | <chem>C=CC1=CC=CC=C1</chem>                                                         | 0.8537 | 0.6515 | -0.0032 | 0.1704 | 0.9552 | 0.058 | 2.93  |
|                       | A2  | Benzophenone                                                                  | 119-61-9   | 182.2  | <chem>C1=CC=C(C(=C1)C(=O)C2=CC=CC=C2</chem>                                         | 1.3721 | 1.3408 | 0.0015  | 0.5071 | 1.4808 | 0.117 | 3.34  |
|                       | A3  | 1,2,3-Propanetricarboxylic acid, 2-(acetyloxy)-, tributyl ester (ATBC)        | 77-90-7    | 402.5  | <chem>CCCCOC(=O)CC(CC(=O)OCCCC)(C(=O)OCCCC)OC(=O)C</chem>                           | 0.3401 | 1.9108 | 0.0015  | 1.7801 | 3.2242 | 0.302 | 4.40  |
|                       | A4  | 1-Octene                                                                      | 111-66-0   | 112.2  | <chem>CCCCCCC=C</chem>                                                              | 0.1009 | 0.0853 | 0.0007  | 0.0741 | 1.1928 | 0.319 | 4.35  |
|                       | A5  | trans,trans-1,4-Diphenyl-1,3-butadiene (DPBD)                                 | 538-81-8   | 206.3  | <chem>C1=CC=C(C(=C1)/C=C/C/C2=CC=CC=C2</chem>                                       | 1.655  | 1.1325 | 0.0127  | 0.4075 | 1.8018 | 0.054 | 5.29  |
|                       | A6  | bis(2-Ethylhexyl) adipate (DEHA)                                              | 103-23-1   | 370.6  | <chem>CCCCC(CC)COC(=O)CCCCC(=O)OCC(CC)CCCC</chem>                                   | 0.0285 | 1.0921 | -0.006  | 1.0898 | 3.3572 | 1.548 | 7.99  |
|                       | A7  | 2,2'-(2,5-Thienediyl)bis[5-(2-methyl-2-propanyl)-1,3-benzoxazole] (Uvitex OB) | 7128-64-5  | 430.6  | <chem>CC(C)(C)C1=CC2=C(C(=C1)OC(=N2)C3=CC=C(S3)C4=NC5=C(O4)C=CC(=C5)C(C)(C)C</chem> | 3.0035 | 2.3222 | 0.0341  | 1.1392 | 3.2795 | 0.148 | 7.90  |
| [44, 45] <sup>c</sup> | B1  | Triacetine                                                                    | 102-76-1   | 218.2  | <chem>CC(=O)OCC(COC(=O)C)OC(=O)C</chem>                                             | 0.1395 | 1.2957 | 0.0011  | 1.3044 | 1.5999 | 0.036 | 0.39  |
|                       | B2  | styrene                                                                       | 100-42-5   | 104.15 | <chem>C=CC1=CC=CC=C1</chem>                                                         | 0.8537 | 0.6515 | -0.0032 | 0.1704 | 0.9552 | 0.080 | 2.93  |
|                       | B3  | benzophenone                                                                  | 119-61-9   | 182.22 | <chem>C1=CC=C(C(=C1)C(=O)C2=CC=CC=C2</chem>                                         | 1.3721 | 1.3408 | 0.0015  | 0.5071 | 1.4808 | 0.200 | 3.34  |
|                       | B4  | diphenylphthalate,                                                            | 84-62-8    | 318.3  | <chem>C1=CC=C(C(=C1)OC(=O)C2=CC=CC(=O)OC3=C(C=CC=C3)C</chem>                        | 1.8788 | 1.8829 | -0.0142 | 1.1163 | 2.3626 | 0.063 | 4.31  |
|                       | B5  | limonene                                                                      | 5989-27-5  | 136.23 | <chem>CC1=CC[C@@H](CC1)C(=C)C</chem>                                                | 0.5312 | 0.2923 | 0.0001  | 0.2266 | 1.323  | 0.224 | 4.34  |
|                       | B6  | acetyl tributyl citrate                                                       | 77-90-7    | 402.5  | <chem>CCCCOC(=O)CC(CC(=O)OCCCC)(C(=O)OCCCC)OC(=O)C</chem>                           | 0.3401 | 1.9108 | 0.0015  | 1.7801 | 3.2242 | 0.100 | 4.40  |
|                       | B7  | 1,4- diphenyl-1,3-butadiene                                                   | 538-81-8   | 206.28 | <chem>C1=CC=C(C(=C1)/C=C/C/C2=CC=CC=C2</chem>                                       | 1.655  | 1.1325 | 0.0127  | 0.4075 | 1.8018 | 0.200 | 5.29  |
|                       | B8  | 2,6-di-tert-butyl-4-methylphenol                                              | 128-37-0   | 220.35 | <chem>CC1=CC(=C(C(=C1)C(C)(C)O)C(C)(C)C</chem>                                      | 0.8384 | 0.8908 | 0.2013  | 0.5123 | 2.0432 | 0.112 | 5.65  |
|                       | B9  | 1-octene                                                                      | 124-18-5   | 142.48 | <chem>CCCCCCCCC</chem>                                                              | 0.0103 | 0.002  | -0.0002 | 0.002  | 1.5176 | 0.200 | 5.87  |
|                       | B10 | Chimassorb 81                                                                 | 1843-05-6  | 326.4  | <chem>CCCCCCCCOC1=CC(=C(C(=C1)C(=O)C2=CC=CC=C2)O</chem>                             | 1.5611 | 1.8107 | 0.4373  | 0.917  | 2.7254 | 0.036 | 6.29  |
|                       | B11 | bis(2-ethylhexyl)adipate                                                      | 103-23-1   | 370.6  | <chem>CCCCC(CC)COC(=O)CCCCC(=O)OCC(CC)CCCC</chem>                                   | 0.0285 | 1.0921 | -0.006  | 1.0898 | 3.3572 | 0.178 | 7.99  |
|                       | B12 | dinonylphthalate                                                              | 84-76-4    | 418.6  | <chem>CCCCCCCCCOC(=O)C1=CC=CC(=C1C(=O)OCCCCCCC</chem>                               | 0.6287 | 1.3116 | -0.001  | 1.0457 | 3.6832 | 0.317 | 9.49  |
|                       | B13 | Irganox 1076                                                                  | 2082-79-3  | 530.9  | <chem>CCCCCCCCCCCCCCCCCOC(=O)CCC1=CC(=C(C(=C1)C(C)(C)C)O)C(C)(C)C</chem>            | 0.724  | 1.254  | 0.3116  | 0.9171 | 4.9356 | 0.159 | 14.83 |

|                   |     |                 |            |        |                                                                                                              |        |        |         |        |        |       |       |
|-------------------|-----|-----------------|------------|--------|--------------------------------------------------------------------------------------------------------------|--------|--------|---------|--------|--------|-------|-------|
|                   | B14 | Irgafos 168     | 31570-04-4 | 646.9  | <chem>CC(C)(C)C1=CC(=C(C=C1)OP(OC2=C(C=C(C=C2)C(C)(C)C(C)(C)C)OC3=C(C=C(C=C3)C(C)(C)C(C)(C)C)C(C)(C)C</chem> | 2.1032 | 1.8939 | 0.0207  | 1.2519 | 5.6943 | 1.000 | 16.66 |
| [42] <sup>d</sup> | C1  | n-decane        | 124-18-5   | 142.48 | <chem>CCCCCCCCC</chem>                                                                                       | 0.0103 | 0.002  | -0.0002 | 0.002  | 1.5176 | 2.500 | 5.87  |
|                   | C2  | d-limonene      | 5989-27-5  | 136.23 | <chem>CC1=CC[C@@H](CC1)C(=C)C</chem>                                                                         | 0.5312 | 0.2923 | 0.0001  | 0.2266 | 1.323  | 0.900 | 4.34  |
|                   | C3  | ethyl caproate  | 123-66-0   | 144.21 | <chem>CCCCC(=O)OCC</chem>                                                                                    | 0.0493 | 0.5714 | -0.0003 | 0.4547 | 1.3102 | 0.550 | 2.94  |
|                   | C4  | hexanal         | 66-25-1    | 100.16 | <chem>CCCCC=O</chem>                                                                                         | 0.1563 | 0.6515 | -0.0013 | 0.4452 | 0.9697 | 0.130 | 1.65  |
|                   | C5  | n-hexanol       | 111-27-1   | 102.17 | <chem>CCCCCO</chem>                                                                                          | 0.2145 | 0.4142 | 0.3692  | 0.4872 | 1.0127 | 0.170 | 1.96  |
|                   | C6  | 2-phenylethanol | 60-12-8    | 122.16 | <chem>C1=CC=C(C=C1)CCO</chem>                                                                                | 0.8213 | 0.9278 | 0.3278  | 0.6568 | 1.0569 | 0.100 | 1.34  |

<sup>a</sup>Used for construction of the predictive models.

<sup>b,c</sup>LDPE-olive oil partition system.

<sup>d</sup>LDPE-sunflower oil partition system.

### SI-B Tabulation of Experimentally Measured and Reported LDPE Extractables by Solvent Extraction (Total 76)

Table SI-B tabulates the collected LDPE extractables and their physicochemical properties by organic solvent extractions [77-83].

| #  | LDPE Extractables                                                          | CAS #      | MW     | SMILES                                                                                                | E      | S       | A       | B       | V      | Log(P <sub>o/w</sub> ) |
|----|----------------------------------------------------------------------------|------------|--------|-------------------------------------------------------------------------------------------------------|--------|---------|---------|---------|--------|------------------------|
| 1  | Nonane                                                                     | 111-84-2   | 128.25 | CCCCCCCCC                                                                                             | 0.0083 | 0.0002  | 0       | 0.0014  | 1.3767 | 5.34                   |
| 2  | Decane                                                                     | 124-18-5   | 142.28 | CCCCCCCCC                                                                                             | 0.0103 | 0.002   | -0.0002 | 0.002   | 1.5176 | 5.87                   |
| 3  | Dodecane                                                                   | 112-40-3   | 170.33 | CCCCCCCCCCC                                                                                           | 0.0111 | 0.0046  | 0.0003  | 0.0037  | 1.7994 | 6.94                   |
| 4  | Tetradecane                                                                | 629-59-4   | 198.39 | CCCCCCCCCCCCC                                                                                         | 0.0098 | 0.0044  | 0.0008  | 0.0027  | 2.0812 | 8.02                   |
| 5  | Hexadecane                                                                 | 544-76-3   | 226.44 | CCCCCCCCCCCCCCC                                                                                       | 0.0085 | 0.004   | 0.0006  | 0.0029  | 2.363  | 9.09                   |
| 6  | Octadecane                                                                 | 593-45-3   | 254.5  | CCCCCCCCCCCCCCCCC                                                                                     | 0.0076 | 0.0016  | -0.0001 | 0.0039  | 2.6448 | 10.16                  |
| 7  | Icosane                                                                    | 112-95-8   | 282.5  | CCCCCCCCCCCCCCCCCCC                                                                                   | 0.0078 | 0.0017  | -0.0004 | 0.0033  | 2.9266 | 11.24                  |
| 8  | Docosane                                                                   | 629-97-0   | 310.6  | CCCCCCCCCCCCCCCCCCCCC                                                                                 | 0.0059 | 0.0011  | -0.0005 | 0.0017  | 3.2084 | 12.32                  |
| 9  | Tetracosane                                                                | 646-31-1   | 338.7  | CCCCCCCCCCCCCCCCCCCCC                                                                                 | 0.0062 | 0.0016  | -0.0004 | 0.0003  | 3.4902 | 13.40                  |
| 10 | Hexacosane                                                                 | 630-01-3   | 366.7  | CCCCCCCCCCCCCCCCCCCCC                                                                                 | 0.0044 | -0.0039 | -0.0006 | -0.0017 | 3.772  | 14.49                  |
| 11 | Octacosane                                                                 | 630-02-4   | 394.8  | CCCCCCCCCCCCCCCCCCCCC                                                                                 | 0.0039 | -0.0032 | -0.0016 | -0.0041 | 4.0538 | 15.57                  |
| 12 | triacontane                                                                | 638-68-6   | 422.8  | CCCCCCCCCCCCCCCCCCCCC                                                                                 | 0.0022 | -0.0021 | -0.0027 | -0.0033 | 4.3356 | 16.64                  |
| 13 | Dotriacontane                                                              | 544-85-4   | 450.59 | CCCCCCCCCCCCCCCCCCCCC                                                                                 | 0.0008 | -0.0001 | -0.0027 | -0.0029 | 4.6174 | 17.71                  |
| 14 | Benzenamine                                                                | 62-53-3    | 93.13  | C1=CC=C(C=C1)N                                                                                        | 0.9518 | 0.9636  | 0.2643  | 0.4027  | 0.8162 | 1.34                   |
| 15 | Cyclododecane                                                              | 294-62-2   | 168.32 | C1CCCCCCCCC1                                                                                          | 0.5602 | 0.0969  | 0.0003  | -0.0004 | 1.6908 | 6.75                   |
| 16 | Squalene                                                                   | 111-02-4   | 410.7  | CC(=CCC/C(=C/CC/C(=C/CC/C(=C/CC/C(=C/CCC=C(C)C)\C)/C)/C)C                                             | 0.7136 | 0.4893  | 0.0174  | 0.626   | 4.0776 | 13.36                  |
| 17 | Triacetine                                                                 | 102-76-1   | 218.2  | CC(=O)OCC(COC(=O)C)OC(=O)C                                                                            | 0.1395 | 1.2957  | 0.0011  | 1.3044  | 1.5999 | 0.39                   |
| 18 | 2,4-Di-t-butyl phenol                                                      | 96-76-4    | 206.32 | CC(C)(C)C1=CC(=C(C=C1)O)C(C)(C)C                                                                      | 0.829  | 0.9203  | 0.4259  | 0.4997  | 1.9023 | 5.12                   |
| 19 | Tris(2,4-di-tert-butylphenyl) phosphate                                    | 95906-11-9 | 662.9  | CC(C)(C)C1=CC(=C(C=C1)OP(=O)(OC2=C(C=C(C=C2)C(C)(C)C(C)(C)C)OC3=C(C=C(C=C3)C(C)(C)C(C)(C)C(C)(C)C)C)C | 2.2882 | 3.3927  | 0.1795  | 2.1477  | 5.753  | 12.32                  |
| 20 | Irgafos 168                                                                | 31570-04-4 | 646.9  | CC(C)(C)C1=CC(=C(C=C1)OP(OC2=C(C=C(C=C2)C(C)(C)C(C)(C)C)OC3=C(C=C(C=C3)C(C)(C)C(C)(C)C(C)(C)C)C)C     | 2.1032 | 1.8939  | 0.0207  | 1.2519  | 5.6943 | 16.66                  |
| 21 | 3,5-di-tert-Butyl-4-hydroxyphenylpropionic acid                            | 20170-32-5 | 278.4  | CC(C)(C)C1=CC(=CC(=C1O)C(C)(C)C)CCC(=O)O                                                              | 0.9848 | 1.4518  | 0.9454  | 0.9321  | 2.3994 | 5.07                   |
| 22 | Benzenepropanoic acid, 3,5-bis(1,1-dimethylethyl)-4-hydroxy-, methyl ester | 6386-38-5  | 292.4  | CC(C)(C)C1=CC(=CC(=C1O)C(C)(C)C)CCC(=O)OC                                                             | 0.8607 | 1.3668  | 0.2313  | 0.8408  | 2.5403 | 5.92                   |
| 23 | Benzenepropanoic acid, 3,5-bis(1,1-dimethylethyl)-4-hydroxy-, 1,1'-[2,2-   | 36913-60-7 | 656.9  | CC(C)(C)C1=CC(=CC(=C1O)C(C)(C)C)CCC(=O)OCC(CO)(CO)COC(=O)CCC2=CC(=C(C=C2)C(C)(C)C)O)C(C)(C)C          | 2.3765 | 2.9458  | 1.1761  | 3.0486  | 5.5121 | 8.83                   |

|    |                                                                                                                                                                                      |            |        |                                                                                                                                              |        |        |         |        |        |       |
|----|--------------------------------------------------------------------------------------------------------------------------------------------------------------------------------------|------------|--------|----------------------------------------------------------------------------------------------------------------------------------------------|--------|--------|---------|--------|--------|-------|
|    | bis(hydroxymethyl)-1,3-propanediyl ester                                                                                                                                             |            |        |                                                                                                                                              |        |        |         |        |        |       |
| 24 | Benzenepropanoic acid, 3,5-bis(1,1-dimethylethyl)-4-hydroxy-, 1,1'-[2-[[3-[3,5-bis(1,1-dimethylethyl)-4-hydroxyphenyl]-1-oxopropoxy]methyl]-2-(hydroxymethyl)-1,3-propanediyl] ester | 84633-54-5 | 917.3  | <chem>CC(C)(C)C1=CC(=CC(=C1O)C(C)(C)CCC(=O)OCC(CO)(COC(=O)CCC2=CC(=C(C(=C2)C(C)(C)O)C(C)(C)COC(=O)CCC3=CC(=C(C(=C3)C(C)(C)O)C(C)(C)CO</chem> | 2.9832 | 3.3889 | 1.1729  | 3.1361 | 7.7442 | 16.92 |
| 25 | Irganox 1010                                                                                                                                                                         | 6683-19-8  | 1176.6 | <chem>CC(C)(C)C1=CC(=CC(=C1O)C(C)(C)CCC(=O)OCC(COC(=O)CCC2=CC(=C(C(=C2)C(C)(C)O)C(C)(C)COC(=O)CCC3=CC(=C(C(=C3)C(C)(C)O)C(C)(C)CO</chem>     | 3.0745 | 3.6829 | 0.8855  | 2.8173 | 9.9763 | 26.27 |
| 26 | Octylphenol ethoxylate                                                                                                                                                               | 9002-93-1  | 250.38 | <chem>CC(C)(C)CC(C)(C)C1=CC=C(C=C1)OCCO</chem>                                                                                               | 0.8327 | 0.9862 | 0.2826  | 0.956  | 2.2428 | 4.77  |
| 27 | Heptadecanamide, N,N'-1,2-ethanediylbis-                                                                                                                                             | 63059-78-9 | 593    | <chem>CC(C)CCCCCCCCCCCCC(=O)NCCNC(=O)CCCCCCC</chem>                                                                                          | 0.6013 | 2.0269 | 0.5262  | 1.6155 | 5.6938 | 14.43 |
| 28 | Diisooctyl phthalate                                                                                                                                                                 | 131-20-4   | 390.6  | <chem>CC(C)CCCCOC(=O)C1=CC=CC=C1C(=O)OCCCCC(C</chem>                                                                                         | 0.631  | 1.2706 | -0.0012 | 1.0119 | 3.4014 | 8.58  |
| 29 | Diisobutyl phthalate                                                                                                                                                                 | 84-69-5    | 278.34 | <chem>CC(C)COC(=O)C1=CC=CC=C1C(=O)OCC(C)C</chem>                                                                                             | 0.6794 | 1.2212 | 0.0043  | 0.9613 | 2.2742 | 4.53  |
| 30 | $\alpha$ -tocopherol                                                                                                                                                                 | 2074-53-5  | 430.71 | <chem>CC1=C(C2=C(CCC(O2)(C)CCCC(C)CCCC(C)C</chem>                                                                                            | 1.098  | 1.1256 | 0.4575  | 0.6958 | 3.9659 | 12.25 |
| 31 | BHT                                                                                                                                                                                  | 128-37-0   | 220.35 | <chem>CC1=CC(=C(C(=C1)C(C)(C)O)C(C)(C)C</chem>                                                                                               | 0.8384 | 0.8908 | 0.2013  | 0.5123 | 2.0432 | 5.65  |
| 32 | 2-Butanone                                                                                                                                                                           | 78-93-3    | 72.11  | <chem>CCC(=O)C</chem>                                                                                                                        | 0.1615 | 0.6911 | 0.0055  | 0.5124 | 0.6879 | 0.30  |
| 33 | Pentanamide                                                                                                                                                                          | 626-97-1   | 101.15 | <chem>CCCCC(=O)N</chem>                                                                                                                      | 0.4392 | 1.2986 | 0.5349  | 0.653  | 0.9286 | 0.27  |
| 34 | Octinoxate                                                                                                                                                                           | 5466-77-3  | 290.4  | <chem>CCCCC(CC)COC(=O)/C=C/C1=CC=C(C=C1)OC</chem>                                                                                            | 0.9795 | 1.2577 | 0.0069  | 0.8584 | 2.4973 | 5.87  |
| 35 | DEHP                                                                                                                                                                                 | 117-81-7   | 390.6  | <chem>CCCCC(CC)COC(=O)C1=CC=CC=C1C(=O)OCC(CC)CC</chem>                                                                                       | 0.6401 | 1.252  | -0.0012 | 1.0286 | 3.4014 | 8.54  |
| 36 | (Z)-Hexanedioic acid, bis(2-ethylhexyl) ester                                                                                                                                        | 103-23-1   | 370.6  | <chem>CCCCC(CC)COC(=O)CCCCC(=O)OCC(CC)CCCC</chem>                                                                                            | 0.0285 | 1.0921 | -0.006  | 1.0898 | 3.3572 | 7.99  |
| 37 | Methyl 10-trans,12-cis-octadecadienoate                                                                                                                                              | 21870-97-3 | 295.4  | <chem>CCCCC/C=C\C=C\CCCCCCCCC(=O)OC</chem>                                                                                                   | 0.2676 | 0.6531 | -0.0001 | 0.6856 | 2.7741 | 7.76  |
| 38 | Nonaic acid                                                                                                                                                                          | 24323-21-5 | 172.26 | <chem>CCCCCCCC(C)(C(=O)O</chem>                                                                                                              | 0.1384 | 0.5834 | 0.5966  | 0.4588 | 1.592  | 4.06  |
| 39 | Oleamide                                                                                                                                                                             | 301-02-0   | 281.5  | <chem>CCCCCCCC/C=C\CCCCCCCC(=O)N</chem>                                                                                                      | 0.5345 | 1.1532 | 0.4509  | 0.8595 | 2.7173 | 6.58  |
| 40 | 11-Eicosenamide, (11Z)-                                                                                                                                                              | 10436-08-5 | 309.5  | <chem>CCCCCCCC/C=C\CCCCCCCCCCCC(=O)N</chem>                                                                                                  | 0.5261 | 1.1526 | 0.4606  | 0.8811 | 2.9991 | 7.57  |
| 41 | Erucamide                                                                                                                                                                            | 112-84-5   | 337.6  | <chem>CCCCCCCC/C=C\CCCCCCCCCCCC(=O)N</chem>                                                                                                  | 0.5198 | 1.1538 | 0.4685  | 0.8979 | 3.2809 | 8.59  |
| 42 | Octanal                                                                                                                                                                              | 124-13-0   | 128.21 | <chem>CCCCCCCC=O</chem>                                                                                                                      | 0.1444 | 0.6557 | -0.0002 | 0.4531 | 1.2515 | 2.68  |
| 43 | Nonanoic acid, methyl ester                                                                                                                                                          | 1731-84-6  | 172.26 | <chem>CCCCCCCCC(=O)OC</chem>                                                                                                                 | 0.0649 | 0.6079 | 0.0004  | 0.456  | 1.592  | 3.98  |
| 44 | 9-Octadecenitrile                                                                                                                                                                    | 61041-55-2 | 263.5  | <chem>CCCCCCCCC=CCCCCCCC#N</chem>                                                                                                            | 0.2726 | 0.8671 | 0.0088  | 0.4711 | 2.6156 | 7.67  |
| 45 | 9-Octadecenamide                                                                                                                                                                     | 3322-62-1  | 281.5  | <chem>CCCCCCCCC=CCCCCCCC(=O)N</chem>                                                                                                         | 0.5337 | 1.1528 | 0.4512  | 0.8596 | 2.7173 | 6.58  |
| 46 | Nonanal                                                                                                                                                                              | 124-19-6   | 142.24 | <chem>CCCCCCCC=O</chem>                                                                                                                      | 0.1395 | 0.6521 | 0.0006  | 0.4526 | 1.3924 | 3.22  |
| 47 | Tetradecanoic acid, methyl ester                                                                                                                                                     | 124-10-7   | 242.4  | <chem>CCCCCCCCCCCCC(=O)OC</chem>                                                                                                             | 0.0336 | 0.6313 | -0.0004 | 0.4516 | 2.2965 | 6.64  |

|    |                                                                                               |            |         |                                                             |         |         |         |         |        |       |
|----|-----------------------------------------------------------------------------------------------|------------|---------|-------------------------------------------------------------|---------|---------|---------|---------|--------|-------|
| 48 | N,N'-(1,2-Ethanediyil)bis(pentadecanamide)                                                    | 5518-18-3  | 508.9   | CCCCCCCCCCCCCCCC(=O)NCCNC(=O)CCCCCCCCCCC                    | 0.5986  | 2.0326  | 0.5231  | 1.6181  | 4.8484 | 11.19 |
| 49 | Hexadecanamide                                                                                | 629-54-9   | 255.44  | CCCCCCCCCCCCCCCC(=O)N                                       | 0.3876  | 1.0779  | 0.4448  | 0.7297  | 2.4785 | 6.11  |
| 50 | Hexadecanamide, N,N'-1,2-ethanediyilbis-                                                      | ??         | 536.9   | CCCCCCCCCCCCCCCC(=O)NCCNC(=O)CCCCCCCCCCC                    | 0.6088  | 2.0329  | 0.5209  | 1.6203  | 5.1302 | 12.27 |
| 51 | Palmitic acid                                                                                 | 57-10-3    | 256.2   | CCCCCCCCCCCCCCCC(=O)O                                       | 0.0415  | 0.6735  | 0.6103  | 0.4544  | 2.4374 | 7.15  |
| 52 | Hexadecanoic acid, methyl ester                                                               | 112-39-0   | 270.5   | CCCCCCCCCCCCCCCC(=O)OC                                      | 0.0233  | 0.6213  | -0.0001 | 0.4527  | 2.5783 | 7.71  |
| 53 | Stearamide                                                                                    | 124-26-5   | 283.5   | CCCCCCCCCCCCCCCC(=O)N                                       | 0.371   | 1.0582  | 0.4472  | 0.7492  | 2.7603 | 7.13  |
| 54 | Stearic acid                                                                                  | 57-11-4    | 284.5   | CCCCCCCCCCCCCCCC(=O)O                                       | 0.022   | 0.6706  | 0.6109  | 0.4528  | 2.7192 | 8.22  |
| 55 | Octadecanoic acid, methyl ester                                                               | 112-61-8   | 298.5   | CCCCCCCCCCCCCCCC(=O)OC                                      | 0.0135  | 0.6057  | -0.0011 | 0.4534  | 2.8601 | 8.80  |
| 56 | 1-Nonadecene                                                                                  | 18435-45-5 | 266.5   | CCCCCCCCCCCCCCCC=C                                          | 0.0782  | 0.0867  | 0.0034  | 0.0747  | 2.7427 | 10.24 |
| 57 | 2-Methyltetracosane                                                                           | 112-95-8   | 282.5   | CCCCCCCCCCCCCCCCCCCC(C)C                                    | -0.0357 | 0.0181  | -0.0015 | -0.0313 | 3.6311 | 14.01 |
| 58 | (Z)-Dotriacontane                                                                             | 1560-78-7  | 352.7   | CCCCCCCCCCCCCCCCCCCCCCCCCCCC                                | 0.0008  | -0.0001 | -0.0027 | -0.0029 | 4.6174 | 17.71 |
| 59 | Tetrapentacontane                                                                             | 544-85-4   | 450.9   | CCCCCCCCCCCCCCCCCCCCCCCCCCCCCCCCCCCCCCCC                    | 0.0284  | 0.0017  | 0.0041  | 0.0079  | 7.7172 | 29.51 |
| 60 | Octacosanol                                                                                   | 5856-66-6  | 759.4   | CCCCCCCCCCCCCCCCCCCCCCCCCCCCCO                              | 0.1598  | 0.369   | 0.358   | 0.4737  | 4.1125 | 13.85 |
| 61 | 1-Heptacosanol                                                                                | 557-61-9   | 410.8   | CCCCCCCCCCCCCCCCCCCCCCCCCCCCCO                              | 0.1545  | 0.3772  | 0.3588  | 0.4721  | 3.9716 | 13.30 |
| 62 | n-Tetracosanol-1                                                                              | 2004-39-9  | 396.7   | CCCCCCCCCCCCCCCCCCCCCCCCCCCCCO                              | 0.1438  | 0.4037  | 0.3649  | 0.4738  | 3.5489 | 11.65 |
| 63 | N,N-Bis(2-hydroxyethyl) octadecylamine                                                        | 506-51-4   | 354.7   | CCCCCCCCCCCCCCCCCN(CCO)CCO                                  | 0.4119  | 0.9276  | 0.6079  | 1.5143  | 3.4256 | 7.19  |
| 64 | Irganox 1076                                                                                  | 10213-78-2 | 357.6   | CCCCCCCCCCCCCCCCCOC(=O)CCC1=CC(=C(C(=C1)C(C)(C)C)O)C(C)(C)C | 0.724   | 1.254   | 0.3116  | 0.9171  | 4.9356 | 14.83 |
| 65 | (Z)-1-Hexadecanol                                                                             | 2082-79-3  | 530.9   | CCCCCCCCCCCCCCCCCO                                          | 0.1584  | 0.42    | 0.3688  | 0.4819  | 2.4217 | 7.32  |
| 66 | Hexadecyl 2-ethylhexanoate                                                                    | 36653-82-4 | 242.44  | CCCCCCCCCCCCCCCCCOC(=O)C(CC)CCCC                            | -0.0238 | 0.5651  | -0.0072 | 0.5089  | 3.5646 | 11.31 |
| 67 | N,N-Bis(2-hydroxyethyl) hexadecylamine                                                        | 59130-69-7 | 368.6   | CCCCCCCCCCCCCCN(CCO)CCO                                     | 0.4131  | 0.9705  | 0.6086  | 1.4121  | 2.862  | 5.35  |
| 68 | Myristyl myristate                                                                            | 18924-66-8 | 301.5   | CCCCCCCCCCCCCOC(=O)CCCCCCCCCCCC                             | -0.0409 | 0.5688  | 0.0017  | 0.459   | 4.1282 | 13.62 |
| 69 | Tridodecylamine                                                                               | 3234-85-3  | 424.7   | CCCCCCCCCCCCCN(CCCCCCCCCC)CCCCCCCCCCCC                      | -0.0182 | 0.1477  | 0.0031  | 0.8304  | 5.2808 | 17.19 |
| 70 | N,N-Bis(2-hydroxyethyl) dodecylamine                                                          | 102-87-4   | 522     | CCCCCCCCCCCCCN(CCO)CCO                                      | 0.415   | 0.9869  | 0.6079  | 1.3645  | 2.5802 | 4.42  |
| 71 | Dilauryl-3,3'-thiodipropionate (Irganox PS 800)                                               | 1541-67-9  | 273.45  | CCCCCCCCCCCCCOC(=O)CCSCCC(=O)OCCCCCCCCCCC                   | 0.4803  | 1.45    | -0.0038 | 1.3069  | 4.6479 | 12.03 |
| 72 | Dibutyl amine                                                                                 | 123-28-4   | 514.799 | CCCCNCCCC                                                   | 0.1127  | 0.2901  | 0.0791  | 0.6886  | 1.3356 | 2.56  |
| 73 | Dibutyl phthalate                                                                             | 111-92-2   | 129.24  | CCCCOC(=O)C1=CC=CC(=O)OCCCC                                 | 0.6941  | 1.2622  | -0.0013 | 0.9447  | 2.2742 | 4.55  |
| 74 | Ethanol, 2-(2-butoxyethoxy), acetate                                                          | 84-74-2    | 278.34  | CCCCOCCOCCOC(=O)C                                           | 0.0655  | 0.9153  | -0.0004 | 1.2556  | 1.7094 | 1.34  |
| 75 | Ethanol, 2-[2-(2-butoxyethoxy)ethoxy]-                                                        | 124-17-4   | 204.26  | CCCCOCCOCCOCCO                                              | 0.1782  | 0.9365  | 0.268   | 1.4457  | 1.7524 | 0.89  |
| 76 | Ethyl 3-(3,5-di-tert-butyl-4-hydroxyphenyl) propanoate<br>Benzenepropanoic acid, 3,5-bis(1,1- | 143-22-6   | 206.28  | CCOC(=O)CCC1=CC(=C(C(=C1)C(C)(C)C)O)C(C)(C)C                | 0.8247  | 1.3733  | 0.2739  | 0.8732  | 2.6812 | 6.32  |



Note: LDPE extractables not by organic solvent extractions are not included in the collection, because they may not be relevant in the chemical characterization studies.

**SI-C Correlation Matrix of Descriptors of Solutes with Measured  $P_{ldpe/lipid}$  (n=78)**

| Table S3. Correlation Matrix of Descriptors of Measured Solutes |                     |                     |                     |                     |                     |
|-----------------------------------------------------------------|---------------------|---------------------|---------------------|---------------------|---------------------|
|                                                                 | <i>Column 1 (E)</i> | <i>Column 2 (S)</i> | <i>Column 3 (A)</i> | <i>Column 4 (B)</i> | <i>Column 5 (V)</i> |
| <i>Column 1 (E)</i>                                             | 1                   |                     |                     |                     |                     |
| <i>Column 2 (S)</i>                                             | 0.726               | 1                   |                     |                     |                     |
| <i>Column 3 (A)</i>                                             | -0.133              | 0.089               | 1                   |                     |                     |
| <i>Column 4 (B)</i>                                             | 0.147               | -0.269              | -0.039              | 1                   |                     |
| <i>Column 5 (V)</i>                                             | 0.510               | 0.684               | 0.043               | 0.088               | 1                   |

**SI-D Correlation Matrix of Observed LDPE Extractables Descriptors (n=76)**

| Table S4. Correlation Matrix of Descriptors of LDPE Extractables |                     |                     |                     |                     |                     |
|------------------------------------------------------------------|---------------------|---------------------|---------------------|---------------------|---------------------|
|                                                                  | <i>Column 1 (E)</i> | <i>Column 2 (S)</i> | <i>Column 3 (A)</i> | <i>Column 4 (B)</i> | <i>Column 5 (V)</i> |
| <i>Column 1 (E)</i>                                              | 1                   |                     |                     |                     |                     |
| <i>Column 2 (S)</i>                                              | 0.874               | 1                   |                     |                     |                     |
| <i>Column 3 (A)</i>                                              | 0.575               | 0.621               | 1                   |                     |                     |
| <i>Column 4 (B)</i>                                              | 0.790               | 0.927               | 0.653               | 1                   |                     |
| <i>Column 5 (V)</i>                                              | 0.545               | 0.487               | 0.307               | 0.495               | 1                   |

## SI-E Tabulation of Over Extraction Data

Table SI-G tabulates the over extraction data, compiled from literatures [14,15,20,22,34,40,41,87,95–98]. The derivation of these values is described in Section 2.8.

| Table S5. Tabulation of Over Extraction Data |                       |             |                           |                  |           |                                    |
|----------------------------------------------|-----------------------|-------------|---------------------------|------------------|-----------|------------------------------------|
| #                                            | Material <sup>a</sup> | Solvent     | Extractables <sup>b</sup> | Temperature (°C) | Over Ext. | Comment <sup>c</sup>               |
| 1                                            | BPE                   | n-Heptane   | n-C32H66 alkane           | 30               | 15.6      | By diffusion coef. to corn oil     |
| 2                                            | BPE                   | n-Heptane   | BHT                       | 30               | 15.7      | By diffusion coef. to corn oil     |
| 3                                            | BPE                   | n-Heptane   | BHT                       | 30               | 13.3      | By diffusion coef. to corn oil     |
| 4                                            | BPE                   | n-Heptane   | BHT                       | 30               | 48.3      | By diffusion coef. to corn oil     |
| 5                                            | BPE                   | n-Heptane   | n-C32H66 alkane           | 60               | 9.2       | By diffusion coef. to corn oil     |
| 6                                            | BPE                   | n-Heptane   | BHT                       | 60               | 7.4       | By diffusion coef. to corn oil     |
| 7                                            | BPE                   | n-Heptane   | BHT                       | 60               | 6.7       | By diffusion coef. to corn oil     |
| 8                                            | BPE                   | n-Heptane   | BHT                       | 60               | 23.0      | By diffusion coef. to corn oil     |
| 9                                            | BPE                   | n-Heptane   | Overall                   | 70               | 7.8       | By total amount to ethanol (=oil)  |
| 10                                           | LDPE                  | Cyclohexane | Irganox 1076              | 40               | 8.5       | By diffusion coef. to olive oil    |
| 11                                           | LDPE                  | Isooctane   | BHT                       | 10               | 5.2       | By diffusion coef. to 95% ethanol  |
| 12                                           | LDPE                  | Isooctane   | BHT                       | 20               | 4.5       | By diffusion coef. to 95% ethanol  |
| 13                                           | LDPE                  | Isooctane   | BHT                       | 40               | 4.1       | By diffusion coef. to 95% ethanol  |
| 14                                           | LDPE                  | Isooctane   | DBP                       | 10               | 3.0       | By diffusion coef. to 95% ethanol  |
| 15                                           | LDPE                  | Isooctane   | DBP                       | 20               | 3.4       | By diffusion coef. to 95% ethanol  |
| 16                                           | LDPE                  | Isooctane   | DBP                       | 40               | 2.9       | By diffusion coef. to 95% ethanol  |
| 17                                           | LDPE                  | Isooctane   | ATBC                      | 10               | 3.0       | By diffusion coef. to 95% ethanol  |
| 18                                           | LDPE                  | Isooctane   | ATBC                      | 20               | 3.2       | By diffusion coef. to 95% ethanol  |
| 19                                           | LDPE                  | Isooctane   | ATBC                      | 40               | 4.3       | By diffusion coef. to 95% ethanol  |
| 20                                           | LDPE                  | Isooctane   | Di-n-butyl phthalate      | 25               | 4.8       | By diffusion rate, ethanol as oil  |
| 21                                           | LDPE                  | Hexane      | Dodecane                  | 23               | 6.2       | By diffusion coef. to ethanol      |
| 22                                           | LDPE                  | Hexane      | Tetradecane               | 23               | 7.5       | By diffusion coef. to ethanol      |
| 23                                           | LDPE                  | Hexane      | Hexadecane                | 23               | 7.7       | By diffusion coef. to ethanol      |
| 24                                           | LDPE                  | Hexane      | Octadecane                | 23               | 7.7       | By diffusion coef. to ethanol      |
| 25                                           | LDPE                  | Hexane      | Eicosane                  | 23               | 6.9       | By diffusion coef. to ethanol      |
| 26                                           | LDPE                  | Hexane      | Docosane                  | 23               | 7.2       | By diffusion coef. to ethanol      |
| 27                                           | LDPE                  | Isooctane   | Irganox 1076              | 5                | 11.3      | By specific amount to retified oil |
| 28                                           | LDPE                  | Isooctane   | Irganox 1076              | 25               | 4.6       | By specific amount to retified oil |
| 29                                           | LDPE                  | Isooctane   | Irganox 1076              | 40               | 2.1       | By specific amount to retified oil |
| 30                                           | LDPE (0.1)            | Isooctane   | Global                    | 40               | 2.1       | By total amount to olive oil       |
| 31                                           | LDPE (0.25)           | Isooctane   | Global                    | 40               | 2.1       | By total amount to olive oil       |

|    |             |               |                 |              |       |                                      |
|----|-------------|---------------|-----------------|--------------|-------|--------------------------------------|
| 32 | LDPE (0.50) | Isooctane     | Global          | 40           | 7.6   | By total amount to HB307             |
| 33 | LDPE (4.40) | Isooctane     | Global          | 40           | 2.9   | By total amount to HB307             |
| 34 | LDPE (4.5)  | Isooctane     | Global          | 40           | 7.6   | By total amount to HB307             |
| 35 | LLDPE       | Heptane       | Hexanal         | 22           | 4.0   | By measured data, heptane to oil     |
| 36 | LLDPE       | Heptane       | Ethyl caproate  | 22           | 0.8   | By measured data, heptane to oil     |
| 37 | LLDPE       | Sunflower Oil | Phenylethanol   | 22           | 0.2   | By measured data, heptane to oil     |
| 38 | LPE         | n-Heptane     | n-C32H66        | 30           | 24.0  | By diffusion coef. to corn oil       |
| 39 | LPE         | n-Heptane     | BHT             | 30           | 38.1  | By diffusion coef. to corn oil       |
| 40 | LPE         | n-Heptane     | BHT             | 30           | 50.5  | By diffusion coef. to corn oil       |
| 41 | LPE         | n-Heptane     | n-C32H66 alkane | 60           | 30.0  | By diffusion coef. to corn oil       |
| 42 | LPE         | n-Heptane     | BHT             | 60           | 12.6  | By diffusion coef. to corn oil       |
| 43 | LPE         | n-Heptane     | BHT             | 60           | 15.5  | By diffusion coef. to corn oil       |
| 44 | LPE         | n-Heptane     | Overall         | 70           | 5.9   | By total amount to ethanol (=oil)    |
| 45 | ABS(0.60)   | Isooctane     | Global          | 40           | 0.9   | By total amount to olive oil         |
| 46 | ABS(0.60)   | Isooctane     | Global          | 40           | 17.8  | By total amount to HB307             |
| 47 | HDPE        | n-Heptane     | Ionox 341       | 20           | 14.3  | By specific amount to olive oil      |
| 48 | HDPE and PP | 1-pentanol    | Irganox 1010    | 48.9 (120 F) | 4.5   | By specific amount, pentanol to oil  |
| 49 | HDPE-0.05   | Isooctane     | Irganox 1076    | 60           | 1.2   | By specific amount to olive oil      |
| 50 | HDPE-0.25   | Isooctane     | Irganox 1076    | 60           | 2.0   | By specific amount to olive oil      |
| 51 | HIPS-0.11   | Isooctane     | Irganox 1076    | 60           | 4.3   | By specific amount to olive oil      |
| 52 | PP          | n-Heptane     | n-C32H66        | 30           | 76.4  | By diffusion coef. to corn oil       |
| 53 | PP          | n-Heptane     | n-C32H66        | 60           | 19.1  | By diffusion coef. to corn oil       |
| 54 | PP          | Isooctane     | BHT             | 40           | 17.4  | By specific amount to ethanol as oil |
| 55 | PP          | Isooctane     | Ionox 220       | 40           | 64.8  | By specific amount to ethanol as oil |
| 56 | PP          | Isooctane     | Uvinul 3039     | 40           | 163.8 | By specific amount to ethanol as oil |
| 57 | PP          | Isooctane     | TBAC            | 40           | 10.1  | By specific amount to ethanol as oil |
| 58 | PP          | Isooctane     | TOTM            | 40           | 16.5  | By specific amount to ethanol as oil |
| 59 | PP-0.05     | Isooctane     | Irganox 1076    | 60           | 4.8   | By specific amount to olive oil      |
| 60 | PP-0.25     | Isooctane     | Irganox 1076    | 60           | 6.9   | By specific amount to olive oil      |

<sup>a</sup>Material Notation:

BPE: branched polyethylene (=LDPE)  
LLDPE: linear low-density polyethylene  
LPE: linear polyethylene (=HDPE)  
ABS: Acrylonitrile butadiene styrene  
PP: polyethylene  
HIPS: High Impact Polystyrene

<sup>b</sup>Extractables Notation:

DBP: Dibutyl phthalate  
ATBC: Acetyl tributyl citrate  
TOTM: Trioctyl Trimellitate

<sup>c</sup>HB307: a fat simulant in food industries. It is a mixture of synthetic triglycerides, primarily C<sub>10</sub>, C<sub>12</sub>, and C<sub>14</sub>.

### SI-F Time-Dependent HDPE Extractables Release Profiles by Different Solvents

The kinetic extractables profiles from HDPE materials by different solvents are shown in Figure SI-1 to SI-3. Three extractables were studied, and they were butylated hydroxytoluene (BHT, SI-1), octadecane (C18, SI-2), and dotriacontane (C32, SI-3) [46].

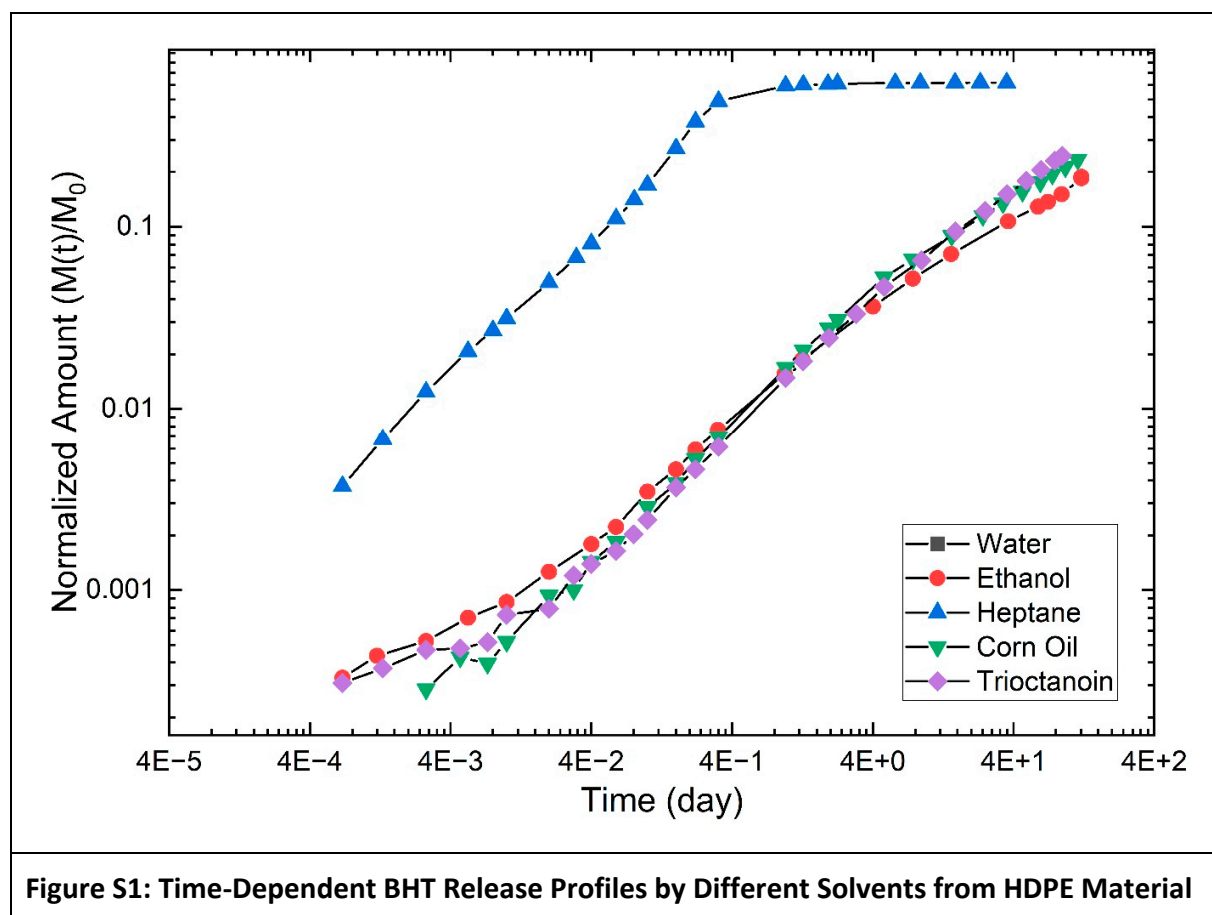

Figure S1: Time-Dependent BHT Release Profiles by Different Solvents from HDPE Material

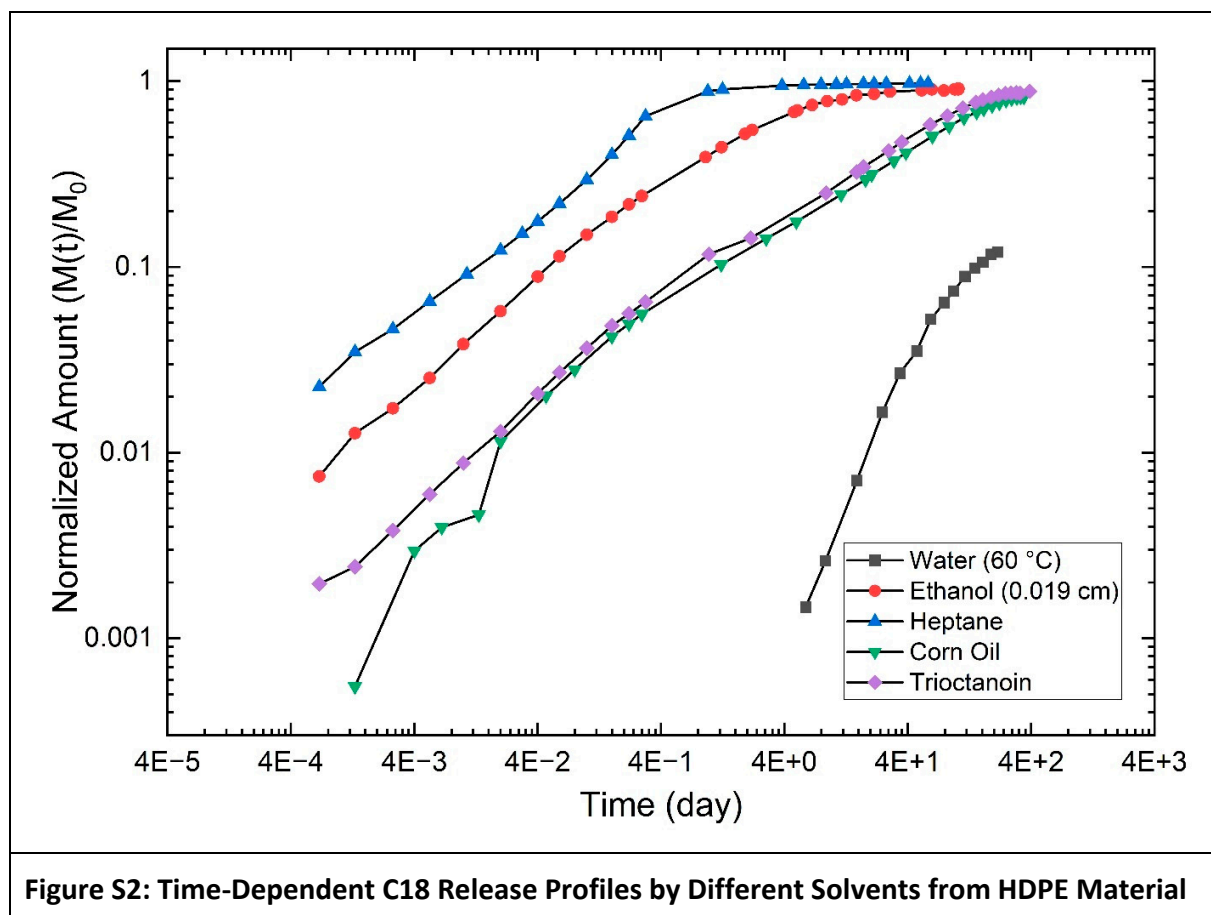

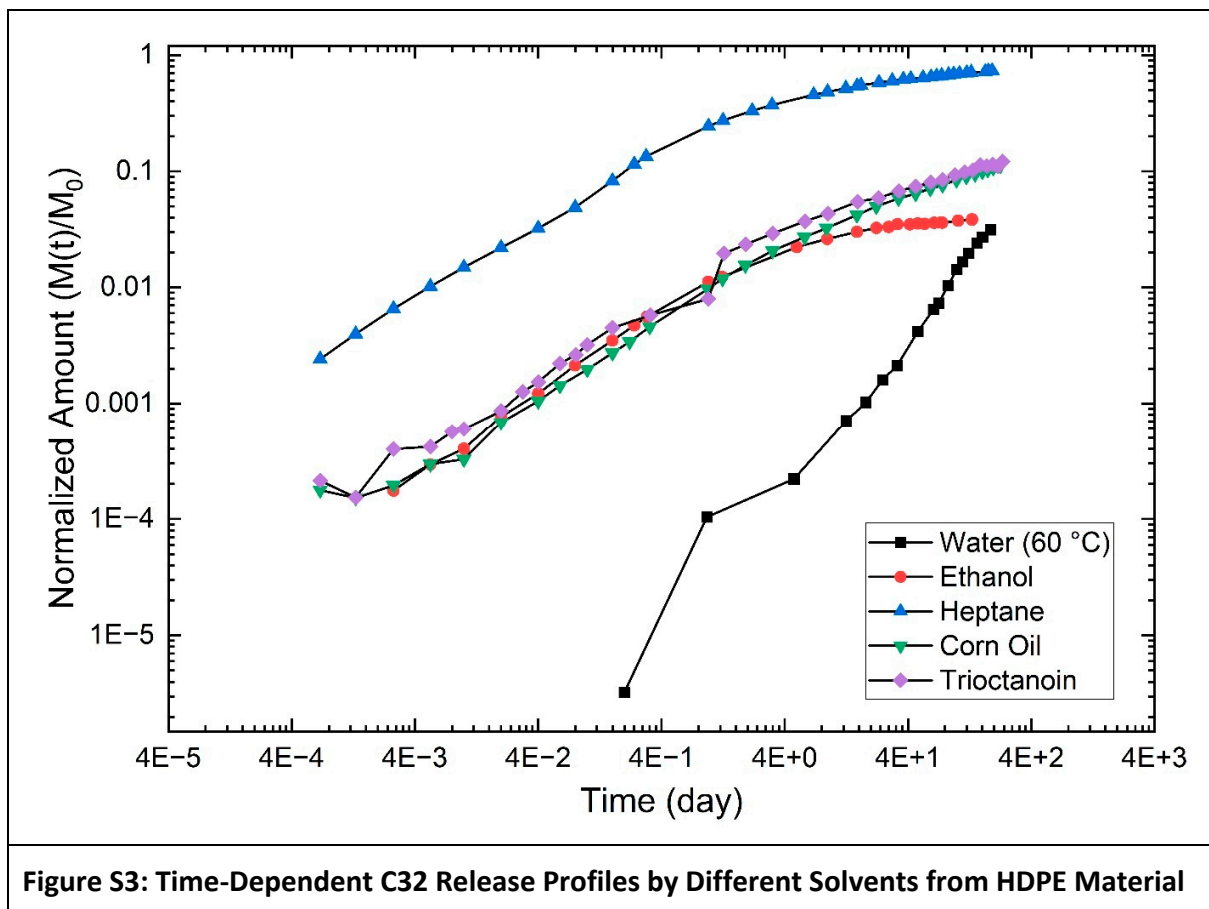

The conclusions from the three figures by HDPE materials are the same as those for LDPE materials in Section 4.8.2. The extraction kinetics by heptane is much faster than those by oils/ethanol, and ethanol has the same release kinetics as the oils.

#### SI-G Dependence of LDPE-Solvent Partition Coefficient on $\log_{10} P_{o/w}$ of Extractables

The dependence of LDPE (and HDPE)-solvent partition coefficient,  $P_{LDPE/S}$ , on  $\log_{10} P_{o/w}$  is examined in Figure SI-4 for additional (extraction) solvents, including methanol, ethanol, acetone [22,23].

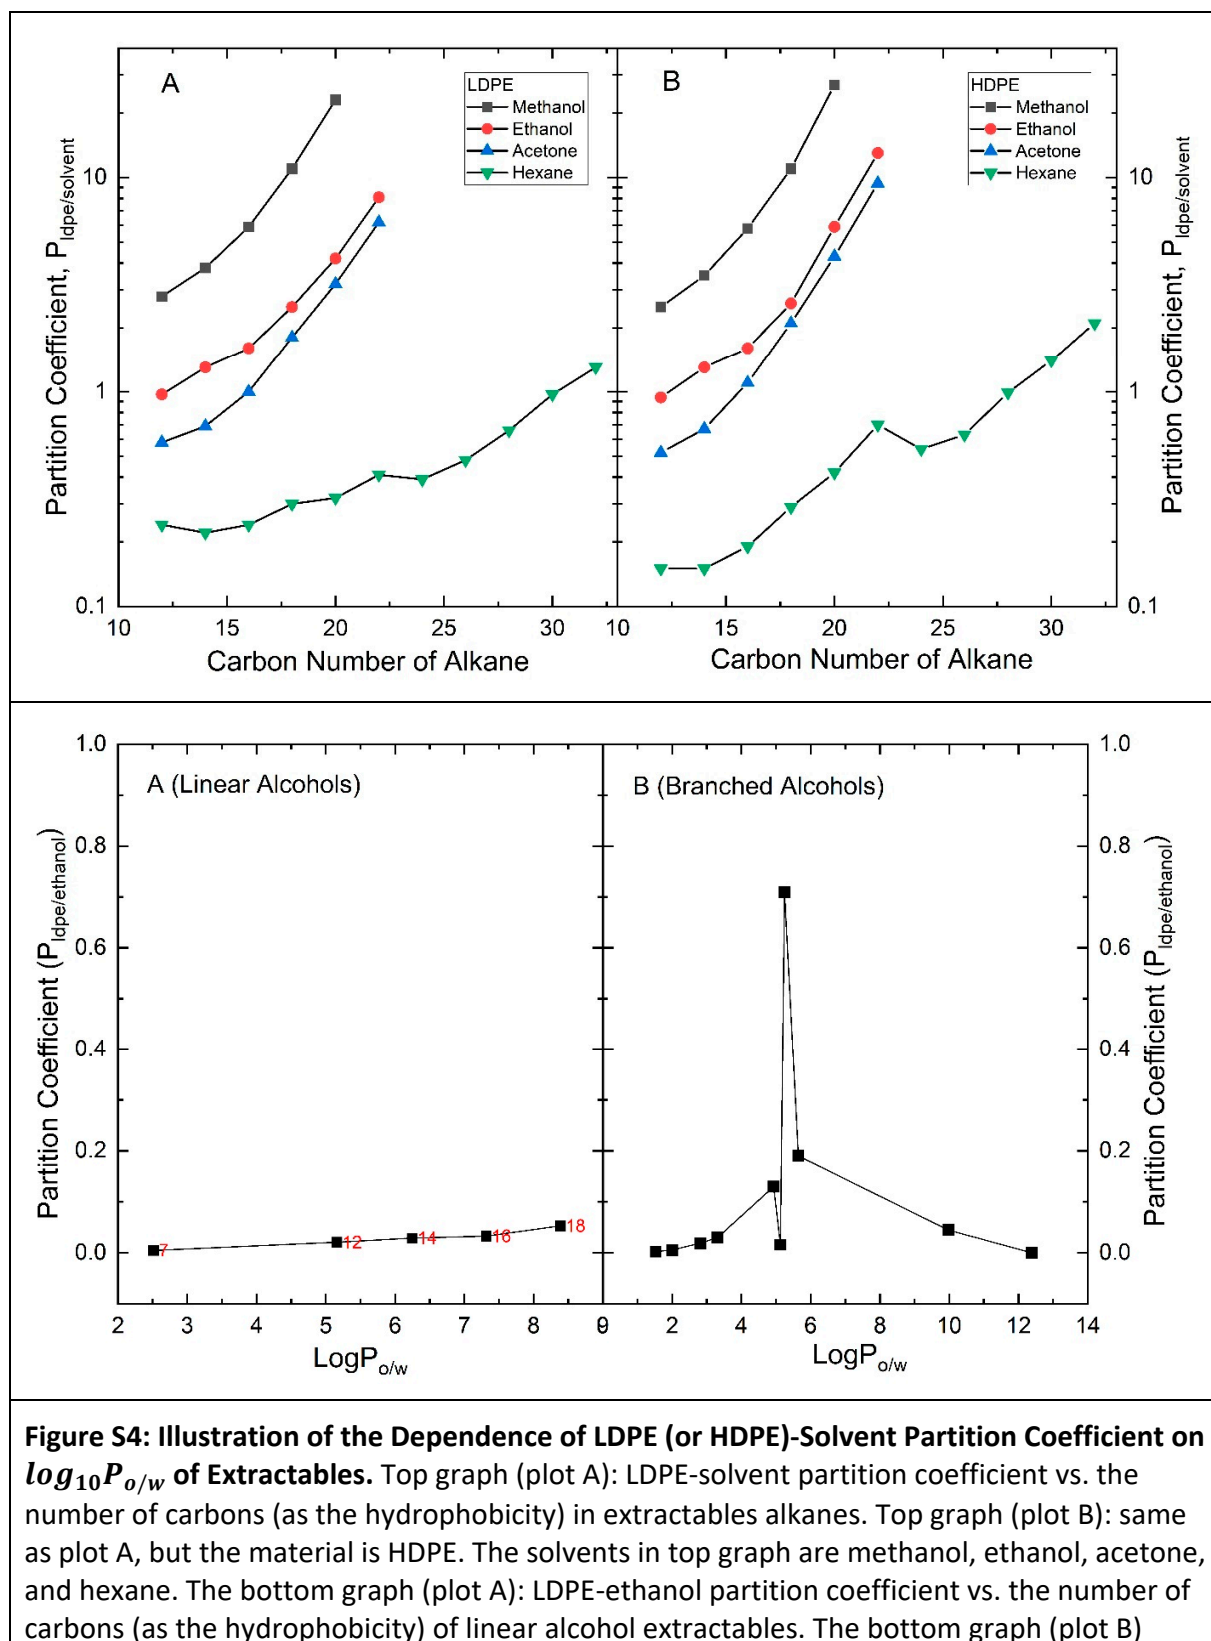

**Figure S4: Illustration of the Dependence of LDPE (or HDPE)-Solvent Partition Coefficient on  $\log_{10}P_{o/w}$  of Extractables.** Top graph (plot A): LDPE-solvent partition coefficient vs. the number of carbons (as the hydrophobicity) in extractables alkanes. Top graph (plot B): same as plot A, but the material is HDPE. The solvents in top graph are methanol, ethanol, acetone, and hexane. The bottom graph (plot A): LDPE-ethanol partition coefficient vs. the number of carbons (as the hydrophobicity) of linear alcohol extractables. The bottom graph (plot B)



shows LDPE-ethanol partition coefficient of branched alcohol extractables against the hydrophobicity by  $\log_{10}P_{o/w}$ , calculated by Eq.6. All data are adopted from ref [22,23].

It is seen in the figure (top graph plot A) that, while the extraction solvent changes from semipolar to nonpolar hexane, the partition coefficient increases with the carbon # for both materials. As the hydrophobicity of alkane extractables is related to number of carbons, the top plot in Figure SI-1 shows a positive dependence of partition coefficient on hydrophobicity.

The bottom graph in the figure shows the partition coefficient (LDPE-ethanol) of different extractables, linear and branched long-chain alcohols, extracted by ethanol. Again, the LDPE-ethanol partition coefficient in general increases slowly with the number of carbons in the linear alcohols or hydrophobicity. However, the change in the partition coefficient for branched alcohols is far from linear with  $\log_{10}P_{o/w}$ , because they don't have the same reference phase [33].

Overall, the data in Figure SI-1 clearly indicate that, if the LDPE-solvent partition coefficients of all extractables are included, specific relationship may not be expected between the LDPE-solvent partition coefficients and  $\log_{10}P_{o/w}$  for semipolar and nonpolar solvents [33].
